# Supplementary material
Source: Elsevier journal article supplement (https://www.sciencedirect.com/science/article/pii/S1138489115000126)
Supplement: mmc1 [file S1138489115000126:mmc1.docx]

**ANEXO 1**

| **1 ¿EXISTE UN *GAP* EN CONTABILIDAD DE GESTIÓN?** | | | | | | | |
| --- | --- | --- | --- | --- | --- | --- | --- |
| Exprese su grado de acuerdo o desacuerdo respecto a las siguientes afirmaciones | | | **De 1, totalmente en desacuerdo a 5, totalmente de acuerdo.** | | | | |
| **1** | **2** | **3** | **4** | **5** |
| 1 | | Hay un *gap* entre la investigación académica y la práctica profesional. | | | | | |
| 2 | | Se debe reducir el *gap* que existe entre la investigación académica y la práctica profesional. | | | | | |
| **2 ¿QUÉ CAUSAS MOTIVAN EL *GAP*?** | | | | | | | |
| Exprese su grado de acuerdo o desacuerdo respecto a las siguientes afirmaciones relativas a las causas que motivan la existencia de un *gap* entre investigación académica y práctica profesional | | | **De 1, totalmente en desacuerdo a 5, totalmente de acuerdo** | | | | |
| **1** | **2** | **3** | **4** | **5** |
| 1. ***CARACTERÍSTICAS DE LA INVESTIGACIÓN*** | | |  | | | | |
| 1 | | Los proyectos de investigación en el área de Contabilidad de Gestión realizada por académicos se encuentran distanciados de las necesidades y/o problemas que plantean las organizaciones. | | | | | |
| 2 | | Los resultados de las investigaciones en CG carecen de utilidad práctica para los profesionales. | | | | | |
| 3 | | La investigación derivada de consultoría tiene mayor utilidad práctica que la investigación académica. | | | | | |
| 4 | | Apreciar el impacto de la investigación en CG es más complejo que en otros campos como la medicina, la ingeniería… | | | | | |
| 5 | | La investigación en CG se dirige, ante todo, a la elaboración de un cuerpo teórico. | | | | | |
| 6 | | Existe una falta de innovación en los temas de las investigaciones de CG. | | | | | |
| 7 | | En la metodología de la investigación tiene un peso excesivo la estadística y los métodos empíricos cuantitativos. | | | | | |
| 8 | | Los resultados de las investigaciones publicadas no se ajustan a las respues­tas a corto plazo que requieren los profesionales. | | | | | |
| 9 | | El auge del carácter multidisciplinar de la CG le ha llevado a olvidarse de los problemas directamente relacionados con la práctica contable. | | | | | |
| 10 | | Los resultados de las investigaciones en CG no se transfieren a las organizaciones y, en general, a la sociedad. | | | | | |
| 1. ***PROFESIONALES*** | | | **1** | **2** | **3** | **4** | **5** |
| 11 | | Los profesionales no acuden a los artículos de las revistas académicas para resolver sus dudas prácticas y/o aumentar su conocimiento. | | | | | |
| 12 | | Los profesionales tienen problemas para entender la metodología científica. | | | | | |
| 13 | | Las organizaciones no consideran a los académicos contables como los mayores expertos para resolver los casos prácticos más problemáticos. | | | | | |
| 1. ***PERSONAL DOCENTE INVESTIGADOR (PDI)*** | | | **1** | **2** | **3** | **4** | **5** |
| 14 | | Las nuevas generaciones de profesores universitarios de contabilidad poseen más conocimiento en metodología y técnicas de investigación, pero un menor conocimiento de la disciplina contable. | | | | | |
| 15 | | Los profesores universitarios consideran que resolver los problemas de las organizaciones no es útil para su carrera académica. | | | | | |
| 16 | | Los profesores no promueven en sus aulas de Grado o Máster Profesional el contacto de sus estudiantes con las revistas contables, tanto divulgativas como científicas. | | | | | |
| 17 | | Los profesores universitarios no tienen contacto directo con las organizaciones y desconocen sus necesidades. | | | | | |
| 1. ***EVALUACIÓN DE LA ACTIVIDAD INVESTIGADORA*** | | | **1** | **2** | **3** | **4** | **5** |
| 18 | | Los profesores universitarios son premiados por publicar en revistas que no tienen interés en la práctica. | | | | | |
| 19 | | Los profesores universitarios de CG se tienen que supeditar al tipo de investigación que publican las revistas de JCR del SSCI para obtener la acreditación y/o tramos de investigación. | | | | | |
| 20 | | En los sistemas de acreditación del profesor universitario no se valora la investigación en CG dirigida a la transferencia del conocimiento. | | | | | |
| 21 | | Como entre los miembros de las agencias de acreditación del profesorado apenas hay especialistas del área contable, la comisión ignora las dificultades reales de investigar en CG. | | | | | |
|  | | ***OTRAS CAUSAS*** | | | | | |
| 22 | | Otras causas que motivan el *gap* (por favor, especifique cuáles) | | | | | |
| **3 ¿CÓMO DISMINUIR EL *GAP*?** | | | | | | | |
| Exprese su grado de acuerdo o desacuerdo respecto a las siguientes afirmaciones relativas a medidas para disminuir el *gap* entre investigación académica y práctica profesional. | | | **De 1, totalmente en desacuerdo a 5, totalmente de acuerdo** | | | | |
| **1** | **2** | **3** | **4** | **5** |
| 1 | | Valorar positivamente en las acreditaciones y tramos de investigación (sexenios) la investigación de carácter aplicado. | | | | | |
| 2 | | Impulsar el contacto de los académicos con los profesionales a través de un mayor peso de las actividades reguladas por el Art. 83 de Ley Orgánica 6/2001, de 21 de diciembre, de Universidades (LOU), “Colaboración con otras entidades o personas físicas”. | | | | | |
| 3 | | Valorar de manera más positiva a los profesores universitarios que publican tanto en revistas científicas como en revistas dirigidas a los profesionales. | | | | | |
| 4 | | Promover un papel más activo de las asociaciones profesionales para unir a académicos y profesionales. | | | | | |
| 5 | | Otras iniciativas para minorar el gap (por favor, especifique cuáles | | | | | |
| **4 PERFIL PROFESIONAL** | | | | | | | |
|  | Por favor, complete las siguientes preguntas relativas a su perfil profesional: | | | | | | |
| 1 | Edad | | | | | | |
| 2 | Sexo | | | | | | |
| 3 | Indique la Universidad a la que pertenece | | | | | | |
| 4 | Indique su categoría profesional (o equivalente) | | | | | | |
| 5 | ¿Cuántos años lleva trabajando en la universidad como docente y/o investigador? | | | | | | |
| 6 | ¿Cuántos tramos de investigación ha conseguido? | | | | | | |
| 7 | Por favor, señale el número de contratos regulados por el Art. 83 de la LOU que ha realizado en los últimos 10 años | | | | | | |
